# Supplementary material for: Synthesis and characterization of Substituted Schiff Base from Benzene-1,4-Diamine: Study of Biological Activity and Corrosion Inhibitor Effect
Source: Research Square preprint supplement (doi:10.21203/rs.3.rs-5147441/v1), 2024-10-14
Supplement: Supplementary file 1 [file 342f79c94a3e4b30312d42fd.docx]

****Synthesis and characterization of Substituted Schiff Base from Benzene-1,4-Diamine: Study of Biological Activity and Corrosion Inhibitor Effect****

Sura Hamid Kathim1*, Hayder Dawood Arkawazi 2†

and Mohamed Loukil3†

*1WasitUniversity, Al-Kut, Wasit, Iraq.

2 Wasit University, Al-Kut, Wasit, Iraq.

3 SfaxUniversity, Al-Ain, Sfax, Tunis.


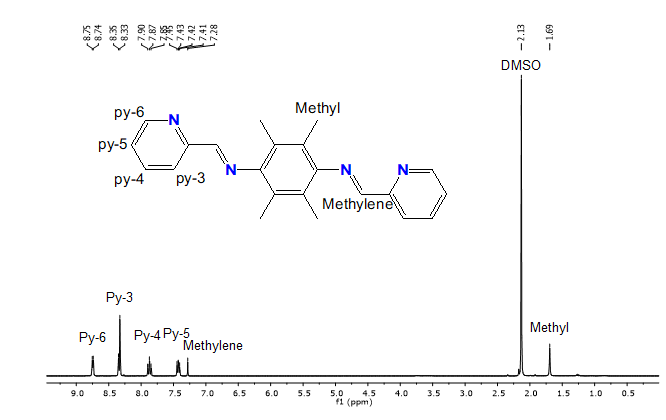


**Fig.S1**. 1H NMR spectrum of " of ligands L2a.


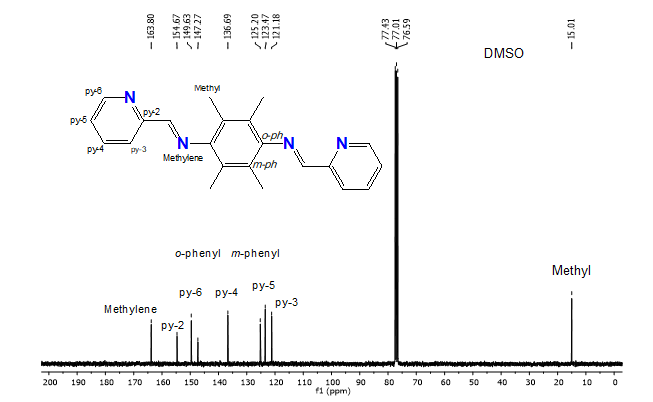


**Fig.S2**.13CNMR spectrum of " of ligands L2a.


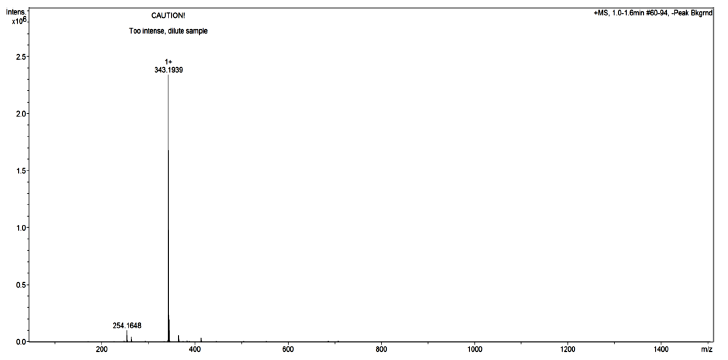


**Fig.S3**. Mass spectrum of " of ligands L2a.


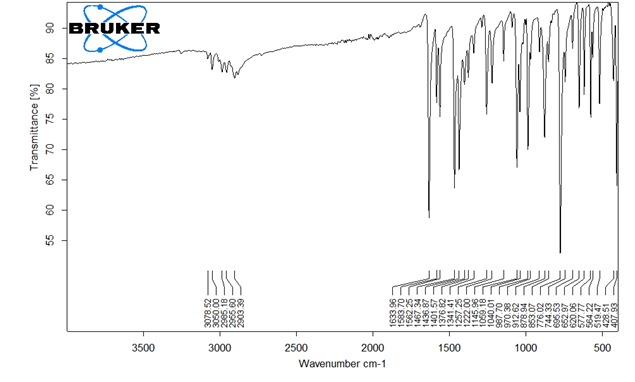


**Figure 4**. FT. IR spectrum of " of ligands L2a


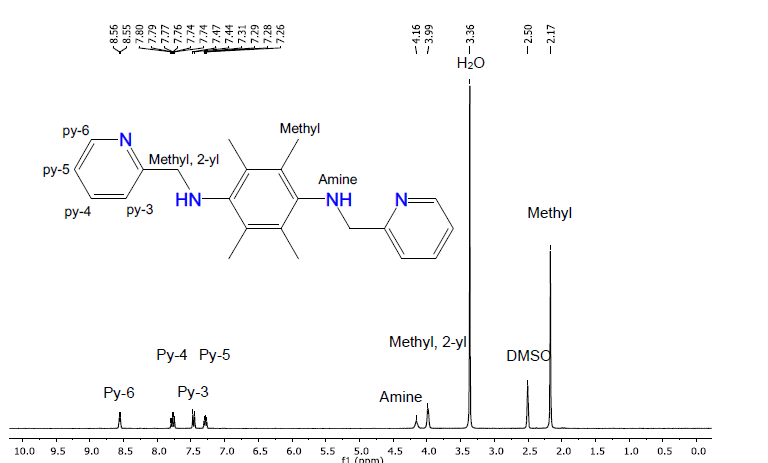


**Fig.S5**.1H NMR spectrum of " of ligands L2b.


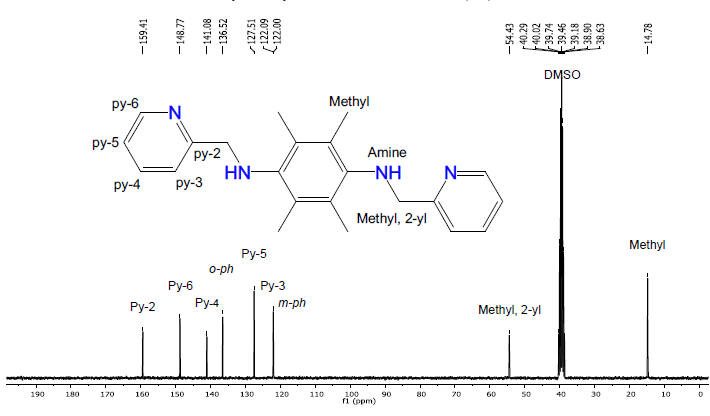


**Fig.S6**.13C NMR spectrum of of ligands L2b.


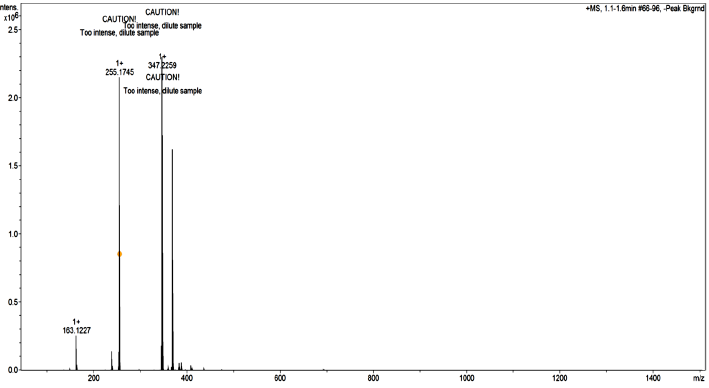


**Fig.S7**.Mass spectrum of of ligands L2b.


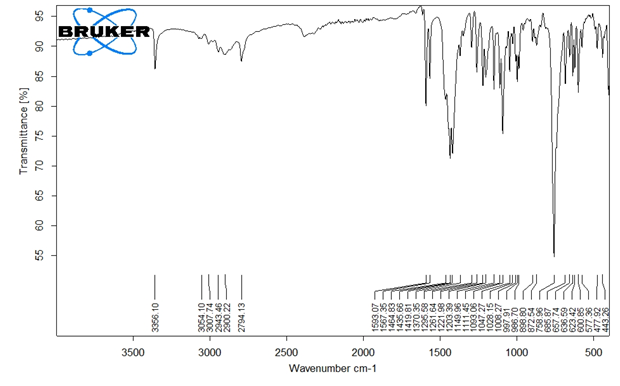


**Figure 8.** FT. IR spectrum " of ligands L2b
